# Supplementary material for: De novo mutations of SETBP1 cause Schinzel-Giedion syndrome
Source: Springer Nature journal article supplement (doi:10.1038/ng.581), 2010-05-02
Supplement: 41588_2010_BFng581_MOESM4_ESM.pdf [file 41588_2010_BFng581_MOESM4_ESM.pdf]

# Supplementary information

## ***De novo* mutations of *SETBP1* cause Schinzel-Giedion syndrome**

Alexander Hoischen<sup>1,\*</sup>, Bregje WM van Bon<sup>1,\*</sup>, Christian Gilissen<sup>1,\*</sup>, Peer Arts<sup>1</sup>, Bart van Lier<sup>1</sup>, Marloes Steehouwer<sup>1</sup>, Petra de Vries<sup>1</sup>, Rick de Reuver<sup>1</sup>, Nienke Wieskamp<sup>1</sup>, Geert Mortier<sup>2</sup>, Koen Devriendt<sup>3</sup>, Marta Z Amorim<sup>4</sup>, Nicole Revencu<sup>5</sup>, Alexa Kidd<sup>6</sup>, Mafalda Barbosa<sup>7</sup>, Anne Turner<sup>8</sup>, Janine Smith<sup>9</sup>, Christina Oley<sup>10</sup>, Alex Henderson<sup>11</sup>, Ian M Hayes<sup>12</sup>, Elizabeth M Thompson<sup>13</sup>, Han G Brunner<sup>1</sup>, Bert BA de Vries<sup>1</sup>, Joris A Veltman<sup>1</sup>

<sup>1</sup>Department of Human Genetics, Radboud University Nijmegen Medical Centre, 6525GA Nijmegen, The Netherlands;

<sup>2</sup>Centre for Medical Genetics, Antwerp University Hospital, Antwerp, Belgium; <sup>3</sup>Centre for Human Genetics, Leuven University Hospital, Leuven, Belgium; <sup>4</sup>Serviço de Genética de Coimbra, Hospital Pediátrico de Coimbra, Coimbra, Portugal;

<sup>5</sup>Centre for Human Genetics, Cliniques Universitaires St Luc, Université Catholique de Louvain, Brussels, Belgium;

<sup>6</sup>Canterbury Health Laboratories, Christchurch Hospital, New Zealand; <sup>7</sup> Centro de Genética Médica Doutor Jacinto

Magalhães, Instituto Nacional de Saúde Doutor Ricardo Jorge, Porto, Portugal; <sup>8</sup>Department of Medical Genetics, Sydney

Children's Hospital, Sydney, Australia; <sup>9</sup>Department of Clinical Genetics, The Children's Hospital at Westmead, Sydney,

Australia; <sup>10</sup>Clinical Genetics Unit, Birmingham Women's Hospital, Birmingham, UK; <sup>11</sup>Institute of Human Genetics,

Newcastle upon Tyne Hospitals NHS Trust, Newcastle upon Tyne, UK; <sup>12</sup>Northern Regional Genetics Service, Auckland, New

Zealand; <sup>13</sup>SA Clinical Genetics Service, SA Pathology, Women's & Children's Hospital site, North Adelaide, South Australia.

\*These authors contributed equally to this work

Correspondence to:

Joris A Veltman, PhD

Department of Human Genetics-855

Radboud University Nijmegen Medical Centre

Box 9101, 6500 HB Nijmegen; The Netherlands

Phone: (+31) 24 36 14941

Fax: (+31) 24 36 68752

Email: [j.veltman@antrg.umcn.nl](mailto:j.veltman@antrg.umcn.nl)

**Supplementary Table 1:** Overview of exome-sequencing performance

| <b>Patient</b>   | <b>Total reads</b> | <b>Uniquely mapped reads</b> | <b>Reads overlapping with targets</b> | <b>Unique reads</b> | <b>Mean coverage</b> | <b>Number of called bases</b> |
|------------------|--------------------|------------------------------|---------------------------------------|---------------------|----------------------|-------------------------------|
| <b>Patient 1</b> | 89,949,891         | 58,189,014                   | 46,075,589                            | 29,610,185          | 47.32                | 196,123,687                   |
| <b>Patient 2</b> | 86,104,150         | 55,453,009                   | 45,014,396                            | 27,565,627          | 47.43                | 178,688,964                   |
| <b>Patient 3</b> | 88,542,531         | 52,783,914                   | 40,266,883                            | 28,586,694          | 40.43                | 195,062,516                   |
| <b>Patient 4</b> | 61,480,688         | 52,684,110                   | 38,528,450                            | 27,384,374          | 36.71                | 213,431,228                   |

**Supplementary Table 2:** Overview of all variants identified by exome sequencing in 4 patients with Schinzel-Giedion syndrome

|                                                                  | <b>Patient 1</b> | <b>Patient 2</b> | <b>Patient 3</b> | <b>Patient 4</b> | <b>Mean</b>   | <b>No. of genes with variants in all 4 samples</b> |
|------------------------------------------------------------------|------------------|------------------|------------------|------------------|---------------|----------------------------------------------------|
| Total variants called                                            | 22,916           | 22,602           | 22,152           | 19,528           | <b>21,800</b> | <b>4,735</b>                                       |
| Exonic + SpliceSites(SS) (+/- 2nts intronic) variants            | 12,196           | 12,255           | 11,796           | 10,498           | <b>11,686</b> | <b>3,331</b>                                       |
| Non-synonymous (NS) + SS variants                                | 5,556            | 5,618            | 5,427            | 4,802            | <b>5,351</b>  | <b>1,634</b>                                       |
| Unknown SNP variants (dbSNP130)                                  | 405              | 401              | 390              | 387              | <b>396</b>    | <b>35</b>                                          |
| Unknown variants (in-house database)                             | 299              | 289              | 275              | 288              | <b>288</b>    | <b>12</b>                                          |
| Genes showing variants in at least 2 different genomic positions |                  |                  |                  |                  |               | <b>2</b>                                           |

**Supplementary Table 3:** Further clinical details of all 13 patients with Schinzel-Giedion syndrome

| Individuals ID                       | 1                             | 2                 | 3               | 4   | 5                                                    | 6                                              | 7   | 8                                      | 9                             | 10                   | 11                  | 12                                       | 13                                          |
|--------------------------------------|-------------------------------|-------------------|-----------------|-----|------------------------------------------------------|------------------------------------------------|-----|----------------------------------------|-------------------------------|----------------------|---------------------|------------------------------------------|---------------------------------------------|
| Gender                               | F                             | M                 | F               | M   | M                                                    | F                                              | F   | F                                      | M                             | F                    | M                   | M                                        | M                                           |
| Current Age                          | -                             | -                 | 1 yr 10m        | -   | -                                                    | 1 yr                                           | -   | -                                      | -                             | 2 yrs                | -                   | 3 yr 1 m                                 | -                                           |
| Age at death                         | 4 yr 6 m                      | 2 yr 3 m          | -               | 7 m | 2 yr 6 m                                             | -                                              | 6 m | 9 yr 3 m                               | u                             | -                    | 3 m                 | -                                        | 7 wks                                       |
| <b>Craniofacial findings</b>         |                               |                   |                 |     |                                                      |                                                |     |                                        |                               |                      |                     |                                          |                                             |
| Head circumference                   | <P3                           | u                 | <P3             | <P3 | u                                                    | P10                                            | <P3 | <P3                                    | p25                           | P3                   | P10                 | <P3                                      | P90                                         |
| Large anterior fontanelle/sutures    | -                             | +                 | u               | +   | +                                                    | +                                              | -   | +                                      | +                             | +                    | +                   | +                                        | +                                           |
| Prominent forehead                   | +                             | +                 | +               | +   | +                                                    | +                                              | +   | +                                      | +                             | -                    | +                   | +                                        | +                                           |
| Bitemporal narrowing                 | +                             | +                 | +               | +   | +                                                    | +                                              | u   | +                                      | +                             | -                    | -                   | +                                        | +                                           |
| Mid-face retraction                  | +                             | +                 | +               | +   | +                                                    | +                                              | +   | +                                      | +                             | +                    | +                   | +                                        | +                                           |
| Prominent eyes/shallow orbits        | +                             | +                 | +               | +   | +                                                    | +                                              | +   | +                                      | +                             | +                    | +                   | +                                        | +                                           |
| Hypertelorism                        | +                             | +                 | +               | +   | +                                                    | +                                              | +   | +                                      | +                             | +                    | -                   | +                                        | +                                           |
| Deep groove under eyes               | +                             | +                 | +               | +   | +                                                    | +                                              | u   | +                                      | +                             | +                    | +                   | +                                        | +                                           |
| Abnormal helices and pinnae          | +                             | +                 | +               | +   | +                                                    | +                                              | +   | +                                      | +                             | +                    | +                   | +                                        | +                                           |
| Low-set ears                         | +                             | +                 | +               | +   | +                                                    | +                                              | +   | +                                      | +                             | +                    | +                   | +                                        | -                                           |
| Short, upturned nose                 | +                             | +                 | +               | +   | +                                                    | +                                              | +   | +                                      | +                             | +                    | +                   | +                                        | +                                           |
| Macroglossia                         | +                             | u                 | -               | -   | -                                                    | -                                              | +   | +                                      | +                             | -                    | +                   | -                                        | u                                           |
| Macrostomia                          | -                             | u                 | -               | -   | +                                                    | -                                              | u   | +                                      | +                             | -                    | u                   | -                                        | +                                           |
| Capillary malformation               | -                             | u                 | -               | -   | -                                                    | +                                              | u   | +                                      | -                             | -                    | -                   | -                                        | -                                           |
| Short neck                           | +                             | +                 | +               | +   | +                                                    | +                                              | +   | +                                      | +                             | +                    | +                   | +                                        | +                                           |
| Hypertrichosis                       | -                             | u                 | -               | -   | -                                                    | +                                              | +   | +                                      | +                             | -                    | +                   | -                                        | -                                           |
| Other                                | upslanting palpebral fissures | hyperconvex nails | cutis marmorata |     |                                                      | upslanting palpebral fissures; cutis marmorata |     | hypoplastic nipples; hyperconvex nails | upslanting palpebral fissures | hypoplastic toenails | hypoplastic nipples |                                          | cleft palate                                |
| <b>Congenital anomalies</b>          |                               |                   |                 |     |                                                      |                                                |     |                                        |                               |                      |                     |                                          |                                             |
| Hydronephrosis/vesicoureteral reflux | +                             | +                 | +               | +   | +                                                    | +                                              | +   | +                                      | +                             | +                    | +                   | +                                        | +                                           |
| Genital abnormalities                | +                             | +                 | +               | +   | +                                                    | +                                              | +   | +                                      | +                             | +                    | +                   | +                                        | +                                           |
| Cardiac defects                      | -                             | +                 | +               | -   | -                                                    | +                                              | +   | +                                      | +                             | -                    | +                   | -                                        | -                                           |
| Choanal stenosis                     | +                             | -                 | +               | -   | -                                                    | +                                              | u   | -                                      | -                             | -                    | -                   | +                                        | -                                           |
| Post-axial polydactyly               | -                             | +                 | -               | -   | -                                                    | -                                              | -   | -                                      | -                             | -                    | -                   | -                                        | -                                           |
| other                                |                               | tracheomalacia    | hip dysplasia   |     | Laryngomalacia nodular growth in forearm of u origin |                                                |     | club feet                              | hydrocele                     |                      |                     | pharyngeal incoordination; renal calculi | tracheomalacia; subglottic cysts; hydrocele |
| <b>Neurodevelopmental anomalies</b>  |                               |                   |                 |     |                                                      |                                                |     |                                        |                               |                      |                     |                                          |                                             |
| Developmental delay                  | +                             | +                 | +               | +   | +                                                    | +                                              | +   | +                                      | +                             | +                    | u*                  | +                                        | u*                                          |
| Seizures                             | +                             | +                 | +               | +   | +                                                    | +                                              | +   | +                                      | +                             | +                    | -                   | +                                        | +                                           |
| Vision impairment                    | +                             | +                 | +               | u   | u                                                    | +                                              | +   | +                                      | +                             | u                    | +                   | -                                        | u                                           |
| Hearing impairment                   | +                             | +                 | +               | u   | u                                                    | +                                              | -   | +                                      | +                             | u                    | +                   | +                                        | u                                           |

|                                                                               |                                      |   |                                             |    |   |                               |                            |                            |                |                |                      |   |                                   |
|-------------------------------------------------------------------------------|--------------------------------------|---|---------------------------------------------|----|---|-------------------------------|----------------------------|----------------------------|----------------|----------------|----------------------|---|-----------------------------------|
| <i>Brain MRI/CT</i>                                                           |                                      |   |                                             |    |   |                               |                            |                            |                |                |                      |   |                                   |
| Ventriculomegaly                                                              | +                                    | u | u                                           | -  | - | -                             | u                          | +                          | +              | -              | -                    | + | +                                 |
| Underdeveloped corpus callosum/septum                                         | +                                    | + | u                                           | +  | + | +                             | u                          | +                          | +              | +              | +                    | - | +                                 |
| Cortical atrophy                                                              | -                                    | + | u                                           | -  | + | u                             | u                          | +                          | -              | u              | -                    | + | +                                 |
| Choroid plexus cysts                                                          | +                                    | u | u                                           | +  | + | u                             | u                          | -                          | -              | u              | +                    | - | -                                 |
| Other                                                                         | polymicrogyria                       |   |                                             |    |   | cortical dysplasia            |                            | dysmorphic ventricles      | Polymicrogyria |                |                      |   |                                   |
| <i>Ophthalmological</i>                                                       |                                      |   |                                             |    |   |                               |                            |                            |                |                |                      |   |                                   |
| Abnormal funduscopy                                                           | u                                    | u | -                                           | +  | u | u                             | u                          | -                          | -              | u              | +                    | - | u                                 |
| Alacrima with corneal hypoesthesia                                            | +                                    | + | -                                           | na | u | u                             | +                          | +                          | +              | +              | +                    | + | u                                 |
| Progressive failure to thrive                                                 | +                                    | + | -                                           | +  | + | +                             | u                          | +                          | +              | +              | +                    | + | u                                 |
| <b>Radiological findings</b>                                                  |                                      |   |                                             |    |   |                               |                            |                            |                |                |                      |   |                                   |
| <i>Skull</i>                                                                  |                                      |   |                                             |    |   |                               |                            |                            |                |                |                      |   |                                   |
| Sclerotic base or mastoid                                                     | u                                    | + | +                                           | +  | + | +                             | +                          | +                          | +              | +              | +                    | - | +                                 |
| Wide occipital synchondrosis                                                  | u                                    | u | -                                           | +  | + | +                             | +                          | -                          | u              | +              | +                    | + | u                                 |
| Steep base                                                                    | u                                    | u | +                                           | +  | + | u                             | u                          | -                          | u              | +              | u                    | + | +                                 |
| Wormian bones                                                                 | u                                    | - | -                                           | -  | + | u                             | u                          | -                          | u              | -              | u                    | - | u                                 |
| <i>Extremities</i>                                                            |                                      |   |                                             |    |   |                               |                            |                            |                |                |                      |   |                                   |
| Cortices: dense, thickened, undertubulated                                    | u                                    | u | -                                           | -  | - | +                             |                            | u                          | u              | +              | u                    | - | u                                 |
| Hypoplastic distal phalanges                                                  | u                                    | u | -                                           | +  | + | +                             | +                          | u                          | u              | +              | u                    | + | +                                 |
| Broad metaphyses                                                              | u                                    | u | -                                           | -  | - | +                             |                            | u                          | +              | -              | u                    | + | u                                 |
| Short first metacarpal                                                        | u                                    | u | -                                           | +  | - | +                             | +                          | +                          | u              | +              | u                    | - | +                                 |
| <i>Chest</i>                                                                  |                                      |   |                                             |    |   |                               |                            |                            |                |                |                      |   |                                   |
| Broad ribs                                                                    | +                                    | + | +                                           | -  | + | +                             | +                          | -                          | +              | +              | u                    | + | -                                 |
| Abnormal (long/irregular) clavicles                                           | -                                    | u | -                                           | -  | - | +                             | u                          | +                          | u              | +              | u                    | - | u                                 |
| Hypoplastic first rib(s)                                                      | -                                    | u | -                                           | -  | + | u                             | u                          | u                          | u              | -              | u                    | - | +                                 |
| <i>Pelvis</i>                                                                 |                                      |   |                                             |    |   |                               |                            |                            |                |                |                      |   |                                   |
| Hypoplastic/underossified pubic bones                                         | +                                    | u | -                                           | u  | + | +                             | u                          | +                          | u              | +              | u                    | + | u                                 |
| Other                                                                         | left kidney lesion of unknown origin |   | bowed forearm bones; radio ulnar synostosis |    |   | wide sutures                  | wide sutures; hydrocephaly | congenital hip dislocation | -              | accessory ribs | cystic mass in spine |   | mild shortening humeri and femora |
| <b>Tumors</b>                                                                 |                                      |   |                                             |    |   | Recurrent sacrococcygeal PNET |                            |                            |                |                | PNET                 |   |                                   |
| u=unknown, PNET = primitive neuroectodermal tumor, * died shortly after birth |                                      |   |                                             |    |   |                               |                            |                            |                |                |                      |   |                                   |
| Table adapted from Lehman et al. <sup>1</sup>                                 |                                      |   |                                             |    |   |                               |                            |                            |                |                |                      |   |                                   |

**Supplementary Figure 1:** Comparison of fold coverage of the targeted exomes for all 4 samples.

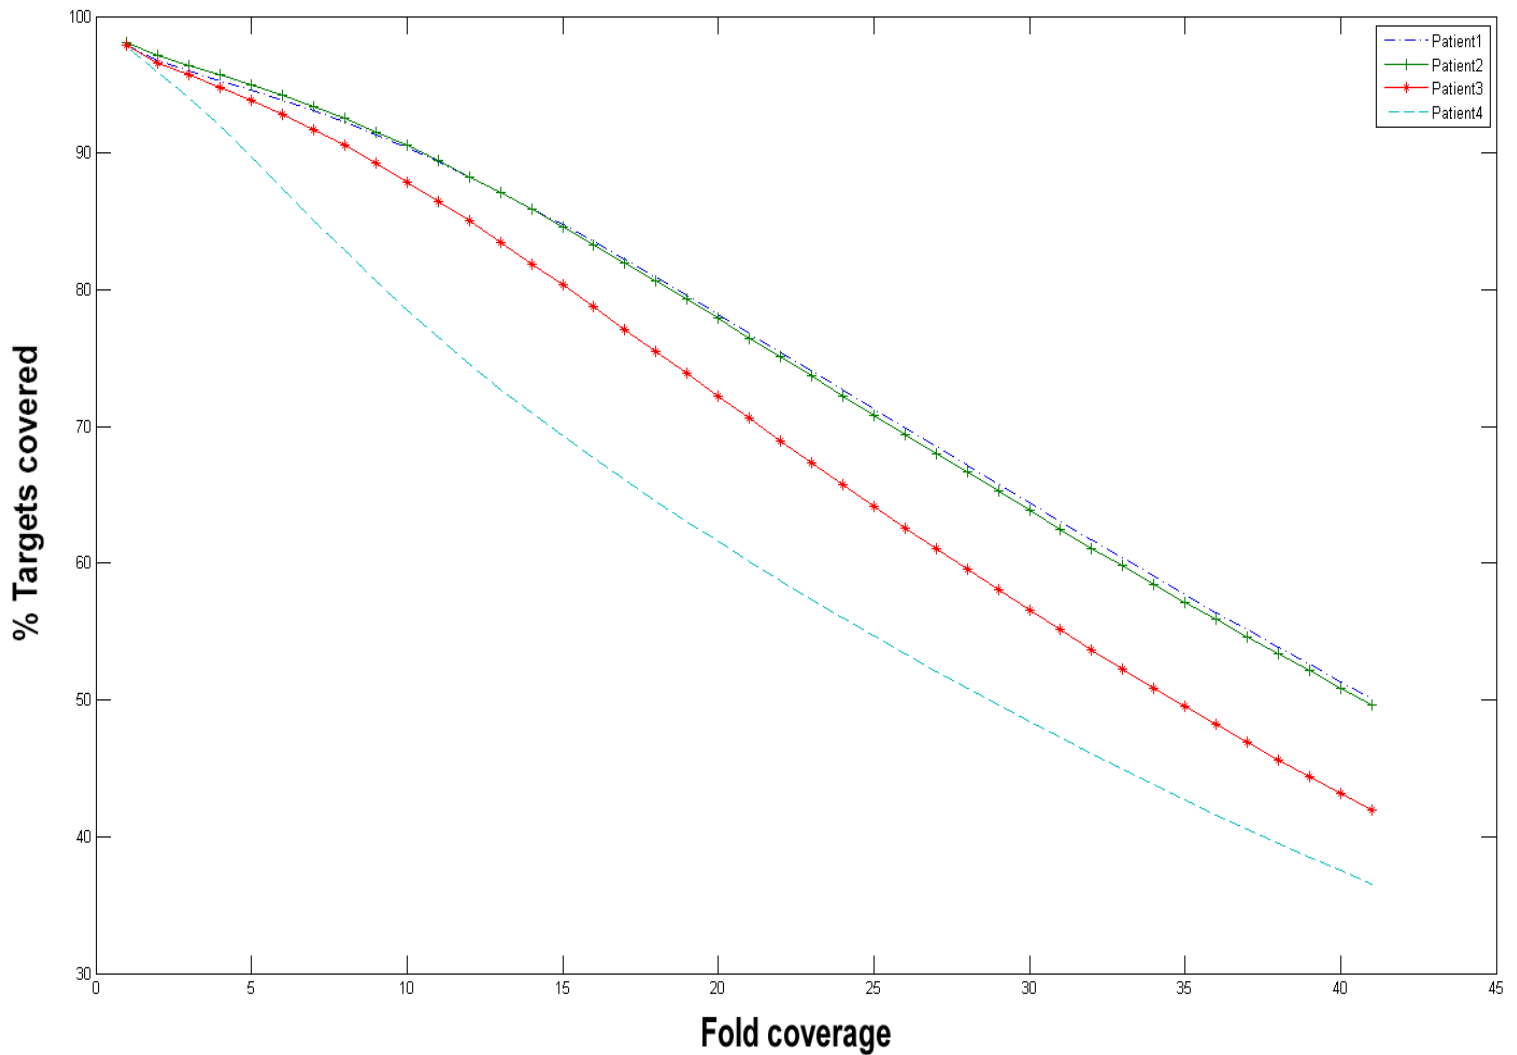

**Figure legend:**

Comparison of fold coverage (x-axis) and percentage of covered targets (y-axis) for all 4 samples.

**Supplementary Figure 2: Comparison of fold coverage of the *SETBP1* gene for all 4 samples.**

**a**

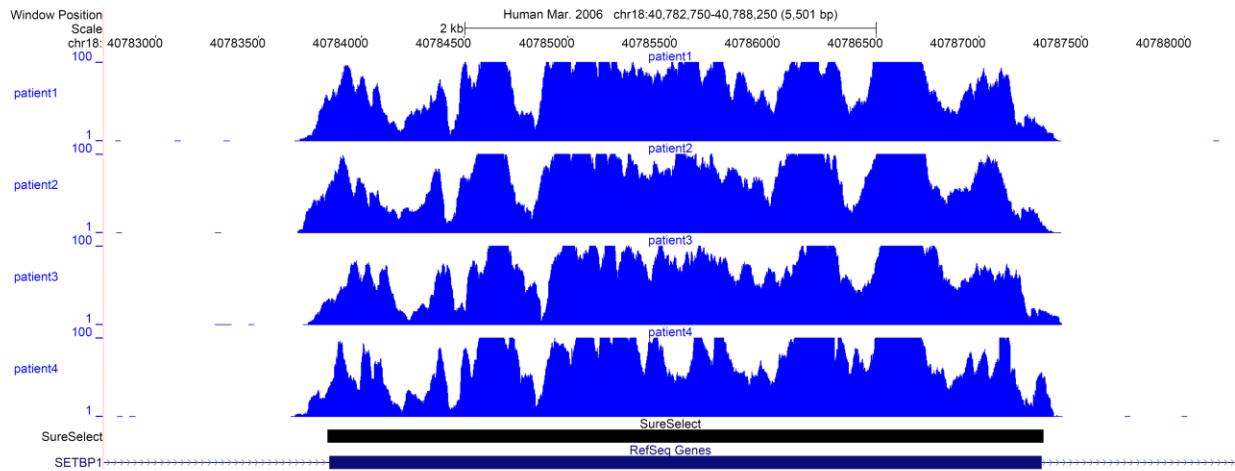

**b**

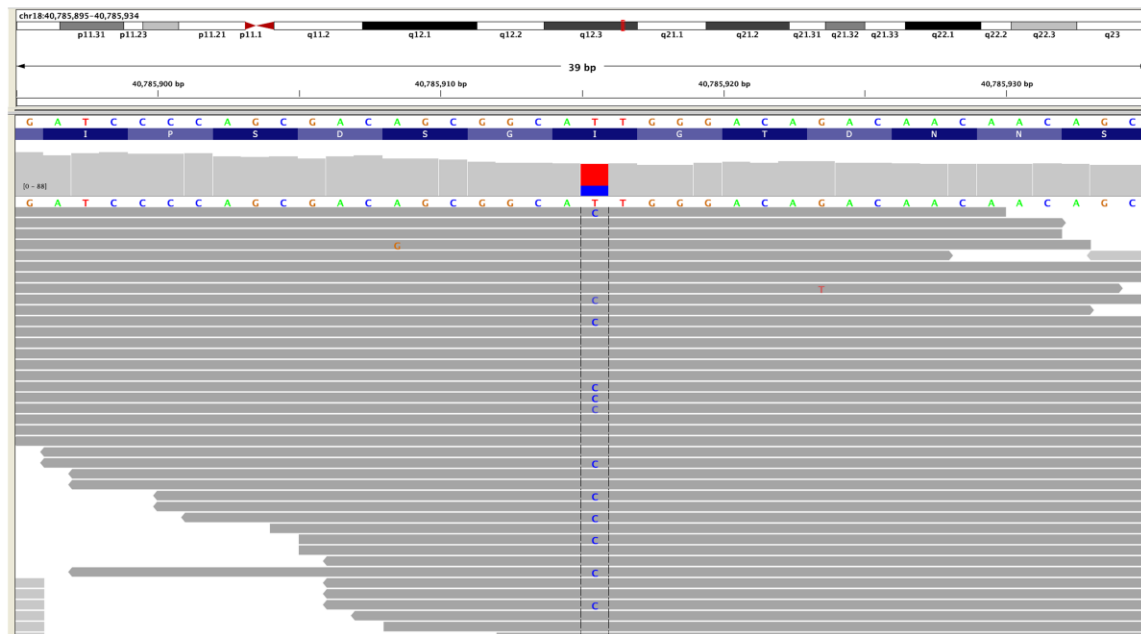

**Figure legend:**

- a) Coverage histogram of read depth per basepair of exon 4 of *SETBP1*, displayed in hg18 version of the UCSC genome browser.
- b) SOLiD sequencing reads displayed for patient 1. Reads overlapping the mutation in exon 4 of *SETBP1* (bp position g.40785915, hg18, NCBI36) show the heterozygous T>C change.

**Supplementary Figure 3: Confirmation of *de novo* SETBP1 mutations by Sanger sequencing**

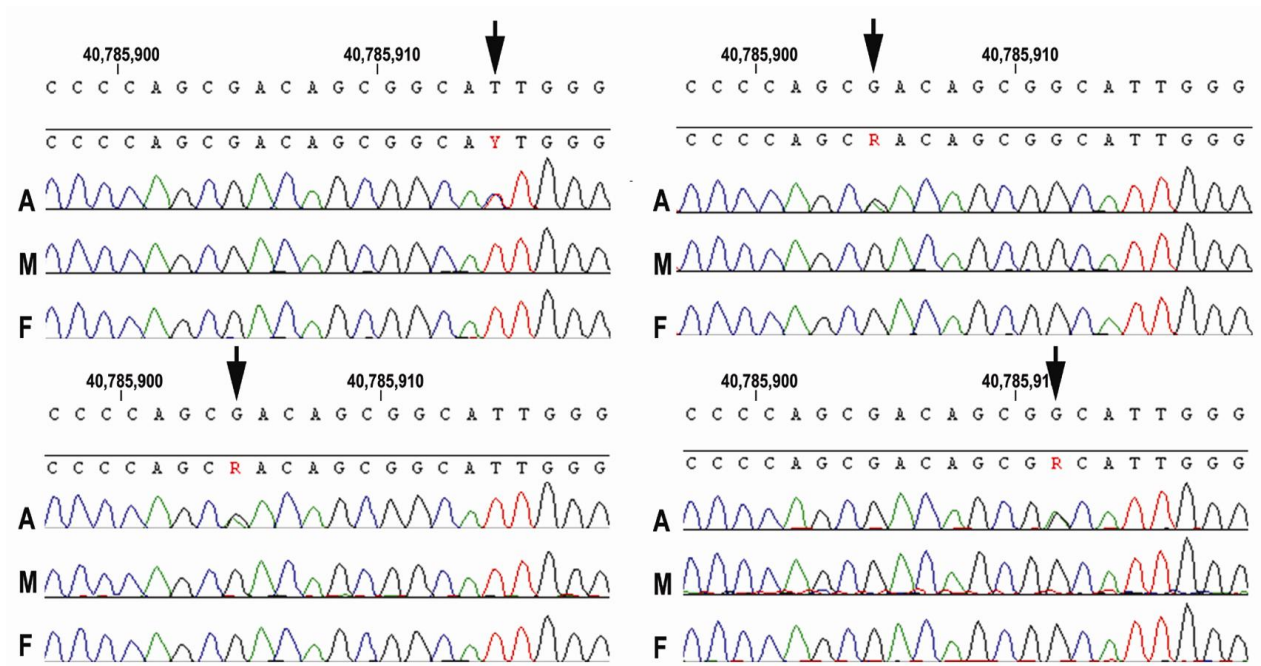

**Figure legend:**

Confirmation and *de novo* proof by Sanger sequencing, shown for Patient 1-4 (A = affected), in comparison with their respective parents (M = mother, F = father).



## Supplementary Note:

### Clinical samples

All 13 Schinzel-Giedion syndrome patients fulfilled the diagnostic criteria suggested by Lehman et al.<sup>1</sup> (Table 1 and supplementary Table 3) and are from various parts of the world (Europe (n=7), New-Zealand (n=3), Australia (n=2) and the USA (n=1)). The DNA samples studied from 13 subjects and 94 normal control DNAs were isolated from peripheral blood leucocytes following standard techniques. This study was approved by the Medical Ethics Committee of the Radboud University Nijmegen Medical Center. Written informed consent to participate in the study was obtained for all patients as well as informed consent to publish clinical photos for cases 1, 3 and 4.

### Exome Sequencing

DNA was obtained from peripheral blood of all patients. This study was approved by the Medical Ethics Committee of the Radboud University Nijmegen Medical Centre. For exome enrichment 3µg genomic DNA was required. We used a AB SOLiD optimized SureSelect human exome kit (Agilent, Santa Clara, CA, USA), which contained exonic sequences of ~18.000 genes, covering a total of 37Mb genomic sequences, following the manufacturer's instructions. The enriched exome libraries were subsequently used for e-PCRs following manufacturer's instructions (Life Technologies, Carlsbad, CA, USA), based on a library concentration of 0.5pM. For each sample one quad of a SOLiD sequencing slide (Life Technologies, Carlsbad, CA, USA) was used.

Color space reads were mapped to the hg18 reference genome with the SOLiD bioscope software which utilizes an iterative mapping approach. Single nucleotide variants were subsequently called by the DiBayes algorithm<sup>2</sup> using the conservative default call stringency. Small insertions and deletions were detected using the SOLiD Small InDel Tool. Called SNP variants and indels were combined and annotated using a custom analysis pipeline.

For prioritization we excluded known SNPs from dbSNP v1.30 and variants from our in-house database which consists of data from in-house targeted resequencing projects (6,595 variants), the 1000 genomes project (<http://www.1000genomes.org>) as well as published data from various studies<sup>3-5</sup> (2,535,563 variants).

## Sanger Sequencing validation

Validation and *de novo* testing for the mutation hotspot was performed by classical Sanger sequencing using following primers. Additional 94 DNAs from normal controls were analyzed for the same amplicon.

| No. | Name           | Sequence             |
|-----|----------------|----------------------|
| 1   | SETBP1_exon4_F | CTTCACCAGCAGCTATGCAC |
| 2   | SETBP1_exon4_R | CGGTGGGAGATTCTGAACAC |

To exclude additional changes in all individuals with Schinzel-Giedion syndrome the following primers have been used to generate amplicons for all coding exons:

| No. | Name               | Sequence                   |
|-----|--------------------|----------------------------|
| 3   | SETBP1_Exon1_Fw    | GGTAAGGAAAGGGGTGGG         |
| 4   | SETBP1_Exon1_Rev   | CAAGAAAGAGACTCAAATCCATTG   |
| 5   | SETBP1_Exon2.1_Fw  | GGCCTCTGGAAGTTAGATTG       |
| 6   | SETBP1_Exon2.1_Rev | CCGCCCTGAGCCTAGTTC         |
| 7   | SETBP1_Exon2.2_Fw  | TTTGCTCTCCACTCCAGGAC       |
| 8   | SETBP1_Exon2.2_Rev | GACCCTAAGAAGTTGAGGATAAAATG |
| 9   | SETBP1_Exon3_Fw    | TGGTAAGTCCATTGCTGGTC       |
| 10  | SETBP1_Exon3_Rev   | ATCCAAGGTTCTGGTTTCTG       |
| 11  | SETBP1_Exon4.1_Fw  | CATGCTCATCTTTGTTTCTCTCTC   |
| 12  | SETBP1_Exon4.1_Rev | ATGCTTTCTGGGCATTCTTG       |
| 13  | SETBP1_Exon4.2_Fw  | CCCCAGAACCACCTACGG         |
| 14  | SETBP1_Exon4.2_Rev | TTTGATGCTGGATTTCTGG        |
| 15  | SETBP1_Exon4.3_Fw  | CCCAGGAGGTGTGTCTAAGC       |
| 16  | SETBP1_Exon4.3_Rev | CTTTTGCCTTCAGAGCAACG       |
| 17  | SETBP1_Exon4.4_Fw  | AGAAAGTTGAAAGCTCGGC        |
| 18  | SETBP1_Exon4.4_Rev | GGACAGCGTGATTTCTTTAG       |
| 19  | SETBP1_Exon4.5_Fw  | ACACAGTGGAACCTGGAAGC       |
| 20  | SETBP1_Exon4.5_Rev | AGGCCTACCACGCTTCTTC        |

|    |                     |                        |
|----|---------------------|------------------------|
| 21 | SETBP1_Exon4.6_Fw   | ACCACGAGAATCCATATCCC   |
| 22 | SETBP1_Exon4.6_Rev  | CTTTGTCTGCGCTACTCAGC   |
| 23 | SETBP1_Exon4.7_Fw   | CACAAGCATAAGCACAAGGAAG |
| 24 | SETBP1_Exon4.7_Rev  | ATGTGTCTGAGGTGCAAAGC   |
| 25 | SETBP1_Exon5_Fw     | TGTTGTCTATCTTCTGTTCCC  |
| 26 | SETBP1_Exon5_Rev    | TCAACAGGCCATTCTCAGTG   |
| 27 | SETBP1_Exon6.1_Fw   | TTGAAGGCACCTTGCATC     |
| 28 | SETBP1_Exon6.1_Rev  | TTCACCTCCTTCTCTGGG     |
| 29 | SETBP1_Exon6.2_Fw   | GGTCATCCACATGGCCC      |
| 30 | SETBP1_Exon6.2_Rev  | AATTTGCAGCTTTTCTCCCC   |
| 31 | SETBP1_Exon6.1_Fw2  | AATAATGCATCTTGGGCACG   |
| 32 | SETBP1_Exon6.1_Rev2 | TGTGTTTCTCTTTCCGCC     |
| 33 | SETBP1_Exon6.2_Fw2  | CCACCCAGTTCGATGAGG     |
| 34 | SETBP1_Exon6.2_Rev2 | TCTGGAGAGAAGGGCGTG     |
| 35 | SETBP1_Exon6.3_Fw   | GCACGGAGACATACCCATAGC  |
| 36 | SETBP1_Exon6.3_Rev  | CTTCTGGAGAGAAGGGCGTG   |
| 37 | SETBP1_Exon6.4_Fw   | AAAAGGAATAATGCATCTTGGG |
| 38 | SETBP1_Exon6.4_Rev  | AGAGAAGGGCGTGGGTGTC    |

## Parentage testing

To confirm parentage in all 10 trios, 16 STR markers have been tested with the AmpFISTR® Identifier® PCR Amplification Kit (Applied Biosystems Inc., Foster City, CA, USA). Parentage was proven for all trios.

## Mutations interpretation

The missense mutations have been tested for mutational effect by the amino acid substitution (AAS) prediction methods SIFT and PolyPhen prediction programs the prediction output is stated in Table 1.

## Amino acid conservation

Accession number of the *SETBP1* protein sequences used for amino acid sequence comparison (Figure 1B) are as follows: Homo sapiens (NM\_015559.2); Pan troglodytes (ENSPTRT00000018330); Pongo pygmaeus (ENSPPYT00000010655); Macaca mulatta (ENSMMUT00000007041); Rattus norvegicus (ENSRNOT00000021717); Mus musculus (ENSMUST00000025430); Canis familiaris (ENSCAFT00000028030); Felis catus (ENSFCAT00000007348); Bos taurus (ENSBTAT00000024078); Gallus gallus (ENSGALT00000002566); Xenopus tropicalis (ENSXETT00000017900).

## Web resources

For variant visualization we used the IGV browser developed at:

<http://www.broadinstitute.org/igv>

For in-house variant database:

<http://www.1000genomes.org>

For genome browser annotations:

<http://genome.ucsc.edu>

For variant effect of identified mutations:

<http://sift.jcvi.org/>

<http://genetics.bwh.harvard.edu/pph/>

## Supplementary Reference List

1. Lehman,A.M. *et al.* Schinzel-Giedion syndrome: report of splenopancreatic fusion and proposed diagnostic criteria. *Am. J. Med. Genet. A* **146A**, 1299-1306 (2008).
2. Marth,G.T. *et al.* A general approach to single-nucleotide polymorphism discovery. *Nat Genet.* **23**, 452-456 (1999).
3. Ng,S.B. *et al.* Targeted capture and massively parallel sequencing of 12 human exomes. *Nature* **461**, 272-276 (2009).
4. Pushkarev,D., Neff,N.F., & Quake,S.R. Single-molecule sequencing of an individual human genome. *Nat Biotechnol.* **27**, 847-852 (2009).
5. Wang,J. *et al.* The diploid genome sequence of an Asian individual. *Nature* **456**, 60-65 (2008).
